# Supplementary material
Source: ML conference proceedings conference paper supplement (https://proceedings.mlr.press/v51/tenzer16.html)
Supplement: Supplementary file 1 [file tenzer16-supp.pdf]

## Supplementary Material

*Proof of lemma 4.2.*

Let  $\mathbf{y} = (y_1 \dots y_n)$ , and  $F_{\mathbf{Y}}(\mathbf{y}) = (F_{y_1}(y_{y_1}) \dots, F_{y_n}(y_n))$  (for readability, we omit  $m$  that indexes the instantiation). By definition of the expectation and conditional density we have:

$$\mathbb{E}_{f(X|\mathbf{y}, y^*)}(X) = \int x \frac{f(x, \mathbf{y}, y^*)}{f(\mathbf{y}, y^*)} dx. \quad (12)$$

Next, recall that the joint density  $f(x, \mathbf{y}, y^*)$  can be written as:

$$f(x, \mathbf{y}, y^*) = c(F_1(x_1), F_{\mathbf{Y}}(\mathbf{y}), F_{y^*}(y^*)) \prod_i f_i(x_i),$$

where  $f_i(x_i)$  are the univariate densities and  $c(\cdot)$  is the copula density. Therefore:

$$f_{\mathbf{Y}, Y^*}(\mathbf{y}, y^*) = \left( \prod_i f_i(y_i) \right) f_{Y^*}(y^*) \int c(F_X(x), \mathbf{F}_{\mathbf{Y}}(\mathbf{y}), F_{Y^*}(y^*)) f_X(x) dx,$$

Plugging this into Equation (12), we then have:

$$\mathbb{E}_{f(X|\mathbf{y}, y^*)}(X) = \int x \frac{c(F_X(x), \mathbf{F}_{\mathbf{Y}}(\mathbf{y}), F_{Y^*}(y^*))}{c(\mathbf{F}_{\mathbf{Y}}(\mathbf{y}), F_{Y^*}(y^*))} f_X(x) dx,$$

and, using a change of variable  $U = F_X(x)$ , we get:

$$\mathbb{E}_{f(\mathbf{X}|\mathbf{y}, y^*)}(\mathbf{X}) = \int F_X^{-1}(u) c(u|\mathbf{F}_{\mathbf{Y}}(\mathbf{y}), F_{Y^*}(y^*)) du,$$

where  $c(u|\mathbf{F}_{\mathbf{Y}}(\mathbf{y}), F_{Y^*}(y^*)) = \frac{c(u, \mathbf{F}_{\mathbf{Y}}(\mathbf{y}), F_{Y^*}(y^*))}{c(\mathbf{F}_{\mathbf{Y}}(\mathbf{y}), F_{Y^*}(y^*))}$ .  $\square$

*Proof of Lemma 4.4.*

Using the notations introduced in Section 3, recall that in the case of a Gaussian copula  $c(U_i|\mathbf{u}_{-i}) = \frac{\phi(Z_i|\mathbf{z}_{-i}; \boldsymbol{\beta}_{-i}, \sigma)}{\phi(z_i)}$ , where  $\phi(Z_i|\mathbf{z}_{-i}; \boldsymbol{\beta}_{-i}, \sigma)$  is the conditional density induced from the joint density  $\phi_{\Sigma}(\mathbf{z})$  by conditioning  $Z_i$  on  $\mathbf{z}_{-i}$ , and  $\phi$  is the standard univariate normal p.d.f. Therefore:

$$\begin{aligned} \mathbb{E}_{C_{\Sigma}}(U_i|\mathbf{u}_{-i}) &= \int_0^1 u_i c(u_i|\mathbf{u}_{-i}) du_i \\ &= \int_0^1 u_i \phi(z_i|\mathbf{z}_{-i}; \boldsymbol{\beta}_{-i}, \sigma) / \phi(z_i) du_i. \end{aligned}$$

Using a change of variables  $z_i = \Phi^{-1}(u_i)$ , we obtain

$$\begin{aligned} \mathbb{E}_{C_{\Sigma}}(U_i|\mathbf{u}_{-i}) &= \int_{-\infty}^{\infty} \Phi(z_i) \phi(z_i|\mathbf{z}_{-i}; \boldsymbol{\beta}_{-i}, \sigma) du_i \\ &= \mathbb{E}_{\phi(Z_i|\mathbf{z}_{-i}; \boldsymbol{\beta}_{-i}, \sigma)}[\Phi(z_i)]. \end{aligned} \quad \square$$

*Proof of Lemma 5.1.*

Recall that when a new variable  $W$  is added as parent of  $X_i$ , we only estimate the scale parameter associated with  $Z_w = \Phi^{-1}(F_W(w))$ , while all other parameters are held fixed (see Section 5). That is,  $\beta_j^+ = \hat{\beta}_j$ ,  $\forall j \neq i$ , and similarly for the variance parameter  $\sigma^+ = \hat{\sigma}$ .

Now, by the definition of QIP

$$\left( z_i[m] - \sum_{j:j \neq i} \hat{\beta}_j z_j[m] \right)^2 = z^*[m]^2, \quad \forall m.$$

Similarly,

$$\begin{aligned} \left( z_i[m] - \sum_{j:j \neq i} \hat{\beta}_j z_j[m] - \beta_w^+ z_w[m] \right)^2 \\ = (z^*[m] - \beta_w^+ z_w[m])^2, \quad \forall m. \end{aligned}$$

Therefore, the change in the likelihood score is given by the difference

$$\begin{aligned} \Delta_{X_i|\text{Par}_i(W)} &= -\frac{M}{2} [\ln(\sigma^+)^2 - \ln \hat{\sigma}^2] \\ &\quad - \frac{1}{2(\sigma^+)^2} \sum_m (z^*[m] - \beta_w^+ z_w[m])^2 + \frac{1}{2\hat{\sigma}^2} \sum_m z^*[m]^2. \end{aligned}$$

Since  $\sigma^+ = \hat{\sigma}$ , using standard algebraic manipulations this reduces to

$$\Delta_{X_i|\text{Par}_i(W)} = -\frac{1}{2(\hat{\sigma})^2} (-2\beta_w^+ (\mathbf{z}^* \cdot \mathbf{z}_w) + (\beta_w^+)^2 \|\mathbf{z}_w\|^2).$$

Taking the derivative w.r.t.  $\beta_w^+$  and setting it to zero we obtain

$$\hat{\beta}_w^+ = \frac{(\mathbf{z}^* \cdot \mathbf{z}_w)}{\|\mathbf{z}^*\|^2},$$

where  $(\cdot)$  is the standard inner product. Plugging this into Equation (7), we get

$$\tilde{\Delta}_{X_i|\text{Par}_i(W)} = \frac{1}{2\hat{\sigma}^2} \frac{(\mathbf{z}^* \cdot \mathbf{z}_w)^2}{\|\mathbf{z}_w\|^2}. \quad (13)$$

Finally, we note that the ML estimator for  $\sigma^2$  is given by:

$$\hat{\sigma}^2 = \frac{1}{M} \sum_m \left( z_i[m] - \sum_{j:j \neq i} \hat{\beta}_j z_j[m] \right)^2 = \frac{1}{M} \|\mathbf{z}^*\|^2. \quad (14)$$

Denote the angle between  $\mathbf{z}^*$  and  $\mathbf{z}_w$  by  $\angle(\mathbf{z}^*, \mathbf{z}_w)$ . Plugging Equation (14) into Equation (13), and using the identity  $\cos^2(\angle(\mathbf{z}^*, \mathbf{z}_w)) = \frac{(\mathbf{z}^* \cdot \mathbf{z}_w)^2}{\|\mathbf{z}^*\|^2 \|\mathbf{z}_w\|^2}$ , we obtain

$$\tilde{\Delta}_{X_i|\text{Par}_i(W)} = \frac{1}{2\hat{\sigma}^2} \frac{(\mathbf{z}^* \cdot \mathbf{z}_w)^2}{\|\mathbf{z}_w\|^2} = \frac{M}{2} \cos^2(\angle(\mathbf{z}^*, \mathbf{z}_w)). \quad \square$$

*Proof of Corollary 5.2.*

Recall that

$$\begin{aligned} \Delta_{X_i|\text{Par}_i(W)} &\equiv \max_{\theta^+} l_X(\mathbf{D} : \text{Par}_i \cup \{W\}, \theta^+) - l_X(\mathbf{D} : \text{Par}_i, \hat{\theta}) \\ &= \max_{\theta^+} \sum_m \log f(x_i[m]|\text{Par}_i[m], w[m]; \theta^+) \\ &\quad - \sum_m \log f(x_i[m]|\text{Par}_i[m]; \hat{\theta}) \\ &= \max_{\theta^+} \sum_m \log c(F_i[m]|\{F_j[m]\}_{j \in \text{Par}_i}, F_W[m]; \theta^+) \\ &\quad - \sum_m \log c(F_i[m]|\{F_j[m]\}_{j \in \text{Par}_i}; \hat{\theta}) \\ &= \max_{\beta^+, \sigma^+} \sum_m \phi(z_i[m]|\mathbf{z}_{\text{Par}_i}[m], z_w[m]; \beta^+, \sigma^+) \\ &\quad - \sum_m \phi(z_i[m]|\mathbf{z}_{\text{Par}_i}[m]; \hat{\beta}, \hat{\sigma}), \end{aligned} \quad (15)$$

Denote by  $\Omega$  the parameter space of  $\beta^+$  and  $\sigma^+$ . When introducing a new parent variable,  $W$ , as a parent of  $X_i$ , ideally, we should estimate  $\theta$  by  $\hat{\theta}_c$ , such that

$$\hat{\theta}_c \in \operatorname{argmax}_{(\beta^+, \sigma^+) \in \Omega} l_X(\mathbf{D} : \operatorname{Par}_i \cup \{W\}, \theta^+).$$

Denote the corresponding change in the likelihood function by:

$$\Delta_{X_i|\operatorname{Par}_i}^c(W) \equiv l_X(\mathbf{D} : \operatorname{Par}_i \cup \{W\}, \hat{\theta}_c) - l_X(\mathbf{D} : \operatorname{Par}_i, \hat{\theta}).$$

However, this can be prohibitive since we need to estimate  $\beta^+, \sigma^+$ , for each candidate parent  $W$ , as well as due to the constrain  $(\beta^+, \sigma^+) \in \Omega$ . Instead, as described in Section 5, we estimate  $\Delta_{X_i|\operatorname{Par}_i}^c(W)$  by  $\tilde{\Delta}_{X_i|\operatorname{Par}_i}^c(W)$ , that is, by maximizing only over the scale parameter associated with  $Z_w$ ,  $\beta_w$ , while keeping all other parameters fixed to their value before  $W$  was added. Note that by doing so, we implicitly remove the constrain over  $\beta_w$  and estimate it by solving the following unconstrained optimization problem:

$$\hat{\beta}_w \in \operatorname{argmax}_{\beta_w} l_X(\mathbf{D} : \operatorname{Par}_i \cup \{W\}, \theta^+),$$

Next, let  $\hat{\theta}_{uc}$  be an estimator of  $\theta$  such that

$$\hat{\theta}_{uc} \in \operatorname{argmax}_{(\beta, \sigma)} l_X(\mathbf{D} : \operatorname{Par}_i \cup \{W\}, \theta^+),$$

that is,  $\hat{\theta}_{uc}$  is a solution to an optimization problem which is a relaxation of the original problem. Denote the corresponding change in the likelihood function by:

$$\Delta_{X_i|\operatorname{Par}_i}^{uc}(W) \equiv l_X(\mathbf{D} : \operatorname{Par}_i \cup \{W\}, \hat{\theta}_{uc}) - l_X(\mathbf{D} : \operatorname{Par}_i, \hat{\theta}).$$

Finally, let  $\theta_0$  be the true underlying parameters. Note that by assumption  $\theta_0 \in \Omega$ .

Denote the true change in the likelihood function by:

$$\Delta_{X_i|\operatorname{Par}_i}^0(W) \equiv l_X(\mathbf{D} : \operatorname{Par}_i \cup \{W\}, \theta_0) - l_X(\mathbf{D} : \operatorname{Par}_i, \hat{\theta}).$$

By definition, for all  $M$  the following holds:

$$\tilde{\Delta}_{X_i|\operatorname{Par}_i}^c(W) \leq \Delta_{X_i|\operatorname{Par}_i}^{uc}(W). \quad (16)$$

Due to consistency of ML parameters, as  $M \rightarrow \infty$ ,  $\hat{\theta}_{uc} \rightarrow \theta_0$ , therefore

$$\Delta_{X_i|\operatorname{Par}_i}^{uc}(W) \rightarrow \Delta_{X_i|\operatorname{Par}_i}^0(W), \text{ a.s.}$$

Similarly, since we have assumed that  $\theta_0 \in \Omega$ ,  $\lim_{M \rightarrow \infty} \hat{\theta}_c = \theta_0$ , a.s., and therefore

$$\Delta_{X_i|\operatorname{Par}_i}^c(W) \rightarrow \Delta_{X_i|\operatorname{Par}_i}^0(W), \text{ a.s.}$$

To summarize, we have that:

$$\lim_{M \rightarrow \infty} \hat{\theta}_c = \lim_{M \rightarrow \infty} \hat{\theta}_{uc} = \theta_0, \text{ a.s.},$$

and,

$$\begin{aligned} \lim_{M \rightarrow \infty} \Delta_{X_i|\operatorname{Par}_i}^c(W) &= \lim_{M \rightarrow \infty} \Delta_{X_i|\operatorname{Par}_i}^{uc}(W) \\ &= \Delta_{X_i|\operatorname{Par}_i}^0(W), \quad M \rightarrow \infty, \text{ a.s.} \end{aligned} \quad (17)$$

Combining now 17 and 16, by continuity of the limit we get:

$$\begin{aligned} \tilde{\Delta}_{X_i|\operatorname{Par}_i}^c(W) &\leq \Delta_{X_i|\operatorname{Par}_i}^{uc}(W) = \lim_{M \rightarrow \infty} \Delta_{X_i|\operatorname{Par}_i}^c(W) \\ &= \Delta_{X_i|\operatorname{Par}_i}^0(W), \quad M \rightarrow \infty, \text{ a.s.} \end{aligned} \quad (18)$$

□
